# Supplementary material for: Checklist of bees (Apoidea) from a private conservation property in west-central Montana
Source: Biodivers Data J. 2017 Mar 30;(5):e11506. doi: 10.3897/BDJ.5.e11506 (PMC5515105; doi:10.3897/BDJ.5.e11506)
Supplement: Supplementary material 1 — MPG species with male and female counts [file bdj-05-e11506-s001.xlsx]

## Sheet: Sheet1
Family	Genus	Subgenus	Species	Subspecies	Number of Males	Number of Females
Colletidae	Colletes		consors	consors	7	10
Colletidae	Colletes		phaceliae		1	3
Colletidae	Colletes		fulgidus	fulgidus	6	22
Colletidae	Colletes		kincaidii		0	1
Colletidae	Hylaeus	Hylaeus	annulatus		0	2
Colletidae	Hylaeus	Hylaeus	conspicuus		1	12
Colletidae	Hylaeus	Hylaeus	mesillae		0	6
Colletidae	Hylaeus	Paraprosopis	coloradensis		1	0
Colletidae	Hylaeus	Paraprosopis	wootoni		4	3
Colletidae	Hylaeus	Prosopis	modestus	citrinifrons	0	6
Andrenidae	Andrena	Andrena	milwaukeensis		0	23
Andrenidae	Andrena	Andrena	schuhi		1	7
Andrenidae	Andrena	Andrena	thaspii		0	18
Andrenidae	Andrena	Andrena	vicinoides		4	8
Andrenidae	Andrena	Andrena	sp. A		1	0
Andrenidae	Andrena	Diandrena	evoluta		0	2
Andrenidae	Andrena	Euandrena	astragali		22	18
Andrenidae	Andrena	Euandrena	lawrencei		53	28
Andrenidae	Andrena	Euandrena	nigrihirta		7	441
Andrenidae	Andrena	Euandrena	nigrocaerulea		134	596
Andrenidae	Andrena	Holandrena	cressonii		4	3
Andrenidae	Andrena	Leucandrena	barbilabris		0	1
Andrenidae	Andrena	Melandrena	nivalis		56	143
Andrenidae	Andrena	Melandrena	transnigra		2	9
Andrenidae	Andrena	Melandrena	vicina		2	0
Andrenidae	Andrena	Micrandrena	chlorogaster		3	10
Andrenidae	Andrena	Micrandrena	illinoiensis		2	0
Andrenidae	Andrena	Micrandrena	melanochroa		0	5
Andrenidae	Andrena	Micrandrena	microchlora		129	67
Andrenidae	Andrena	Micrandrena	piperi		0	2
Andrenidae	Andrena	Micrandrena	cf. robinsoni		1	0
Andrenidae	Andrena	Plastandrena	crataegi		0	5
Andrenidae	Andrena	Plastandrena	prunorum		21	109
Andrenidae	Andrena	Scaphandrena	merriami		9	23
Andrenidae	Andrena	Scaphandrena	scurra		20	16
Andrenidae	Andrena	Scaphandrena	sladeni		5	5
Andrenidae	Andrena	Simandrena	angustitarsata		0	10
Andrenidae	Andrena	Simandrena	pallidifovea		0	30
Andrenidae	Andrena	Thysandrena	candida		2	13
Andrenidae	Andrena	Thysandrena	medionitens		12	110
Andrenidae	Andrena	Thysandrena	w-scripta		0	8
Andrenidae	Andrena	Trachandrena	amphibola		7	34
Andrenidae	Andrena	Trachandrena	cupreotincta		31	22
Andrenidae	Andrena	Trachandrena	forbesii		0	1
Andrenidae	Andrena	Trachandrena	miranda		0	6
Andrenidae	Andrena	Trachandrena	salicifloris		1	42
Andrenidae	Andrena	Tylandrena	subtilis		14	163
Andrenidae	Calliopsis		xenus		0	1
Andrenidae	Panurginus		atriceps		268	391
Andrenidae	Panurginus		sp. 01		211	766
Andrenidae	Perdita	Perdita	fallax		3	2
Andrenidae	Perdita	Perdita	swenki		0	1
Andrenidae	Perdita	Pygoperdita	wyomingensis	segona	5	9
Andrenidae	Pseudopanurgus		didirupa		3	15
Halictidae	Agapostemon	Agapostemon	obliquus		0	2
Halictidae	Agapostemon	Agapostemon	texanus		257	4927
Halictidae	Agapostemon	Agapostemon	virescens		154	1181
Halictidae	Dufourea		holocyanea		1	0
Halictidae	Dufourea		maura		12	30
Halictidae	Dufourea		trochantera		42	40
Halictidae	Halictus	Nealictus	farinosus		24	1081
Halictidae	Halictus	Odontalictus	ligatus		230	1571
Halictidae	Halictus	Protohalictus	rubicundus		37	2317
Halictidae	Halictus	Seladonia	confusus		4	24
Halictidae	Halictus	Seladonia	tripartitus		29	11682
Halictidae	Lasioglossum	Dialictus	spp.		595	22110
Halictidae	Lasioglossum	Hemihalictus	glabriventre		1	65
Halictidae	Lasioglossum	Hemihalictus	inconditum		0	16
Halictidae	Lasioglossum	Hemihalictus	kincaidii		0	5
Halictidae	Lasioglossum	Hemihalictus	ovaliceps		0	1
Halictidae	Lasioglossum	Hemihalictus	ruficorne		0	19
Halictidae	Lasioglossum	Hemihalictus	sp. 1		0	173
Halictidae	Lasioglossum	Hemihalictus	sp. 2		0	2
Halictidae	Lasioglossum	Hemihalictus	sp. 3		0	15
Halictidae	Lasioglossum	Hemihalictus	sp. 4		0	2
Halictidae	Lasioglossum	Lasioglossum	anhypops		0	1
Halictidae	Lasioglossum	Lasioglossum	athabascense		0	1
Halictidae	Lasioglossum	Lasioglossum	egregium		10	93
Halictidae	Lasioglossum	Lasioglossum	paraforbesii		1	21
Halictidae	Lasioglossum	Lasioglossum	sisymbrii		4	39
Halictidae	Lasioglossum	Lasioglossum	trizonatum		20	625
Halictidae	Lasioglossum	Lasioglossum	zonulum		6	275
Halictidae	Lasioglossum	Sphecodogastra	cooleyi		30	6275
Halictidae	Lasioglossum	Sphecodogastra	lusoria		0	2
Halictidae	Sphecodes		spp.		31	101
Megachilidae	Anthidium	Anthidium	atrifrons		2	1
Megachilidae	Anthidium	Anthidium	mormonum		0	2
Megachilidae	Anthidium	Anthidium	utahense		2	6
Megachilidae	Ashmeadiella	Ashmeadiella	bucconis		1	7
Megachilidae	Ashmeadiella	Ashmeadiella	cactorum		0	5
Megachilidae	Ashmeadiella	Ashmeadiella	californica		4	9
Megachilidae	Ashmeadiella	Ashmeadiella	cubiceps		0	1
Megachilidae	Atoposmia	Atoposmia	elongata		2	1
Megachilidae	Chelostoma	Chelostoma	minutum		2	0
Megachilidae	Coelioxys	Boreocoelioxys	banksi		0	2
Megachilidae	Coelioxys	Boreocoelioxys	moesta		3	0
Megachilidae	Coelioxys	Boreocoelioxys	octodentata		0	2
Megachilidae	Coelioxys	Boreocoelioxys	rufitarsis		3	6
Megachilidae	Coelioxys	Cyrtocoelioxys	modesta		0	1
Megachilidae	Coelioxys	Xerocoelioxys	edita		0	1
Megachilidae	Coelioxys	Xerocoelioxys	grindeliae		0	1
Megachilidae	Dianthidium	Dianthidium	curvatum		2	2
Megachilidae	Dianthidium	Dianthidium	pudicum		18	98
Megachilidae	Dianthidium	Dianthidium	subparvum		6	61
Megachilidae	Dianthidium	Dianthidium	ulkei		1	6
Megachilidae	Dioxys		pomonae		1	2
Megachilidae	Heriades	Neotrypetes	carinatus		4	9
Megachilidae	Heriades	Neotrypetes	variolosus		0	7
Megachilidae	Hoplitis	Alcidamea	grinnelli		11	1
Megachilidae	Hoplitis	Alcidamea	pilosifrons		2	0
Megachilidae	Hoplitis	Alcidamea	producta		13	25
Megachilidae	Hoplitis	Alcidamea	sambuci		2	5
Megachilidae	Hoplitis	Cyrtosmia	hypocrita		10	9
Megachilidae	Hoplitis	Monumetha	albifrons		1	12
Megachilidae	Hoplitis	Monumetha	fulgida	fulgida	14	10
Megachilidae	Megachile	Argyropile	parallela		5	13
Megachilidae	Megachile	Chelostomoides	angelarum		0	1
Megachilidae	Megachile	Eutricharaea	apicalis		58	85
Megachilidae	Megachile	Eutricharaea	rotundata		0	1
Megachilidae	Megachile	Litomegachile	brevis		3	0
Megachilidae	Megachile	Litomegachile	coquilletti		0	11
Megachilidae	Megachile	Litomegachile	lippiae		0	1
Megachilidae	Megachile	Litomegachile	onobrychidis		36	298
Megachilidae	Megachile	Megachile	lapponica		0	2
Megachilidae	Megachile	Megachile	montivaga		0	40
Megachilidae	Megachile	Megachile	relativa		2	2
Megachilidae	Megachile	Megachiloides	pascoensis		1	1
Megachilidae	Megachile	Sayapis	fidelis		0	10
Megachilidae	Megachile	Sayapis	pugnata		1	1
Megachilidae	Megachile	Xanthosarus	melanophaea		3	3
Megachilidae	Megachile	Xanthosarus	perihirta		31	401
Megachilidae	Osmia	Acanthosmioides	integra		18	10
Megachilidae	Osmia	Acanthosmioides	longula		15	7
Megachilidae	Osmia	Cephalosmia	californica		103	99
Megachilidae	Osmia	Cephalosmia	marginipennis		1	0
Megachilidae	Osmia	Cephalosmia	montana	montana	0	6
Megachilidae	Osmia	Helicosmia	coloradensis		5	6
Megachilidae	Osmia	Melanosmia	albolateralis		55	38
Megachilidae	Osmia	Melanosmia	atrocyanea		22	18
Megachilidae	Osmia	Melanosmia	austromaritima		0	1
Megachilidae	Osmia	Melanosmia	brevis		57	17
Megachilidae	Osmia	Melanosmia	bruneri		16	6
Megachilidae	Osmia	Melanosmia	calla		23	14
Megachilidae	Osmia	Melanosmia	cyaneonitens		5	3
Megachilidae	Osmia	Melanosmia	densa		0	41
Megachilidae	Osmia	Melanosmia	ednae		4	1
Megachilidae	Osmia	Melanosmia	juxta		14	12
Megachilidae	Osmia	Melanosmia	kincaidii		24	5
Megachilidae	Osmia	Melanosmia	melanopleura		0	1
Megachilidae	Osmia	Melanosmia	paradisica		1	0
Megachilidae	Osmia	Melanosmia	proxima		1	0
Megachilidae	Osmia	Melanosmia	pusilla		32	35
Megachilidae	Osmia	Melanosmia	trevoris		116	92
Megachilidae	Osmia	Melanosmia	tristella		3	3
Megachilidae	Osmia	Mystacosmia	nemoris		0	1
Megachilidae	Osmia	Osmia	lignaria	propinqua	2	5
Megachilidae	Stelis	Stelis	aff. Ashmeadiellae		8	1
Megachilidae	Stelis	Stelis	aff. holocyanea		1	2
Megachilidae	Stelis	Stelis	lateralis		1	0
Megachilidae	Stelis	Stelis	montana		2	1
Megachilidae	Stelis	Stelis	sp. 01		0	2
Apidae	Anthophora	Clisodon	terminalis		0	8
Apidae	Anthophora	Lophanthophora	pacifica		2	12
Apidae	Anthophora	Lophanthophora	porterae		1	3
Apidae	Anthophora	Lophanthophora	ursina		21	36
Apidae	Anthophora	Melea	bomboides		1	5
Apidae	Anthophora	Melea	occidentalis		1	15
Apidae	Anthophora	Mystacanthophora	urbana		1	9
Apidae	Anthophora	Mystacanthophora	walshii		0	2
Apidae	Apis		mellifera		0	566
Apidae	Bombus	Bombias	nevadensis		1	0
Apidae	Bombus	Bombus	occidentalis		0	7
Apidae	Bombus	Cullumanobombus	rufocinctus		0	14
Apidae	Bombus	Fervidobombus	californicus		4	12
Apidae	Bombus	Fervidobombus	fervidus		14	86
Apidae	Bombus	Psithyrus	fernaldae		1	0
Apidae	Bombus	Psithyrus	insularis		3	4
Apidae	Bombus	Pyrobombus	bifarius		8	205
Apidae	Bombus	Pyrobombus	centralis		15	88
Apidae	Bombus	Pyrobombus	flavifrons		18	50
Apidae	Bombus	Pyrobombus	huntii		2	6
Apidae	Bombus	Pyrobombus	mixtus		1	2
Apidae	Bombus	Pyrobombus	vagans		0	3
Apidae	Bombus	Subterraneobombus	appositus		0	8
Apidae	Ceratina	Zadontomerus	acantha		23	131
Apidae	Ceratina	Zadontomerus	nanula		95	148
Apidae	Ceratina	Zadontomerus	neomexicana		69	315
Apidae	Diadasia		diminuta		0	11
Apidae	Epeolus		aff. americanus		0	1
Apidae	Epeolus		compactus		0	1
Apidae	Epeolus		minimus		0	1
Apidae	Epeolus		sp. 01		0	2
Apidae	Eucera	Synhalonia	edwardsii		26	61
Apidae	Eucera	Synhalonia	frater	lata	4	3
Apidae	Eucera	Synhalonia	fulvitarsis		2	0
Apidae	Eucera	Synhalonia	hurdi		2	0
Apidae	Habropoda		cineraria		3	2
Apidae	Melecta	Melecta	pacifica		88	125
Apidae	Melecta	Melecta	separata		5	24
Apidae	Melecta	Melecta	thoracica		5	11
Apidae	Melissodes	Callimelissodes	composita		4	1
Apidae	Melissodes	Callimelissodes	lupina		14	87
Apidae	Melissodes	Callimelissodes	sp. 1		0	1
Apidae	Melissodes	Eumelissodes	agilis		14	14
Apidae	Melissodes	Eumelissodes	nr. microsticta		112	1087
Apidae	Melissodes	Eumelissodes	sp. 2		0	1
Apidae	Melissodes	Heliomelissodes	rivalis		1	1
Apidae	Neopasites	Neopasites	fulviventris		4	2
Apidae	Nomada		sp. A		9	0
Apidae	Nomada		sp. B		22	0
Apidae	Nomada		sp. C		2	0
Apidae	Nomada		sp. D		6	0
Apidae	Nomada		sp. E		2	0
Apidae	Nomada		sp. F		8	0
Apidae	Nomada		sp. G		5	0
Apidae	Nomada		sp. H		7	0
Apidae	Nomada		sp. I		21	0
Apidae	Nomada		sp. J		3	0
Apidae	Nomada		sp. K		2	0
Apidae	Nomada		sp. L		5	0
Apidae	Nomada		sp. M		1	0
Apidae	Nomada		sp. N		2	0
Apidae	Nomada		sp. O		3	0
Apidae	Nomada		scita		34	27
Apidae	Triepeolus		heterurus		0	1
Apidae	Triepeolus		aff. micropygius		0	1
Apidae	Triepeolus		paenepectoralis		5	16
Apidae	Triepeolus		sp. 01		0	1
Apidae	Xeromelecta	Melectomorpha	californica		0	1
